# Supplementary material for: Genome-wide identification and evolution of HECT genes in wheat
Source: PeerJ. 2020 Dec 2;8:e10457. doi: 10.7717/peerj.10457 (PMC7718792; doi:10.7717/peerj.10457)
Supplement: Supplemental Information 3 [file peerj-08-10457-s003.xls]

## Sheet: Sheet1
Table S2. TPM log2-transfromed transcription count data for 25 wheat HECT genes in 15 tissues.
Gene	Group	Arabidopsis ortholog	roots seedling stage	roots three leaf stage	roots Flag leaf stage	stem two nodes detectable	stem 1 cm spike	stem anthesis	leaf seedling stage	leaf tillering stage	leaf 2 dpa	spike two nodes detectable	spike Flag leaf stage	spike anthesis	grain 2 dpa	grain 14 dpa	grain 30 dpa
TraesCS5B02G112800	II	UPL8	3.66071	3.47241	3.58542	3.63466	4.22682	3.0544	2.39872	2.94098	3.12198	4.43397	4.64043	4.44594	4.33449	2.47435	3.18901
TraesCS5A02G121600	II	UPL8	3.88256	3.70762	3.7526	3.93364	4.32424	3.21564	2.56188	3.06483	3.32109	4.47714	4.6529	4.53097	4.48305	2.719	3.49332
TraesCS5D02G118000	II	UPL8	3.4439	3.2495	3.32465	3.22181	4.07711	2.63289	2.16683	2.76367	2.79849	4.2108	4.40781	4.16765	3.99717	2.30638	2.93337
TraesCS3B02G194900	IV	UPL6	0	0	0	0.0966377	0.284635	0	0	0	0	0.603625	1.50634	0.234777	0	0	0.414471
TraesCS7B02G313300	IV	UPL6	0	0	0	0	0	0	0	0	0	1.8911	1.4662	1.29815	0.313711	0	0
TraesCS1A02G106100	IV	UPL6	3.44936	3.38151	3.51837	3.43651	3.55455	3.04697	2.2094	2.47299	3.03024	3.98169	4.0717	4.0158	3.77529	0.523898	3.63613
TraesCS1B02G123400	IV	UPL6	3.51355	3.32533	3.49039	3.43892	3.55542	3.12085	2.0953	2.45925	2.88972	3.86992	4.02139	4.00906	3.79505	0.613949	3.13922
TraesCS1D02G108900	IV	UPL6	3.37465	3.16468	3.41409	3.26596	3.43502	3.10533	1.9521	2.22448	2.45723	3.57742	3.8283	3.87917	3.64491	0.70967	3.16228
TraesCS4D02G025000	V	UPL7	1.22426	1.01436	1.2256	1.39707	1.59945	1.06374	0.606231	0.679032	1.22427	1.54632	2.04838	1.71013	1.3486	0	0
TraesCS4B02G027200	V	UPL7	0.837071	1.08036	1.33395	0.868023	1.2128	1.00804	0.134725	0.813397	1.29882	1.28237	1.8444	1.14945	0.767735	0	0
TraesCS4A02G285800	V	UPL7	1.09652	0.725893	0.869937	1.28637	1.18229	0.924556	0.443327	0.534385	0.980048	1.52657	1.5382	1.44462	1.26094	0	0
TraesCS7A02G244000	III	UPL5	0	0	0	0	0	0	0	0	0	0	0	0	0	0.158234	0
TraesCS7B02G496200	III	UPL5	0	0	0	0	0	0	0	0	0	0	0	0	0	0	0
TraesCS5D02G270200	III	UPL5	1.45271	1.33629	1.49731	1.35024	0.524229	1.088	0	0	0.827944	1.99116	2.21811	2.29323	2.10807	0.584727	0
TraesCS5A02G262600	III	UPL5	2.24666	1.8744	1.94773	1.72677	0.774764	1.19114	0	0.289173	1.11436	1.87373	2.01311	2.08579	2.46174	0.609663	0
TraesCS5B02G261000	III	UPL5	2.27698	1.97763	2.05896	1.78213	0.974327	1.2362	0	0.163679	1.12279	2.49846	2.44049	2.44703	2.42235	0.80433	0
TraesCS6D02G005600	VI	UPL3	3.60651	3.46148	3.53576	3.62613	3.80174	3.40833	2.3108	2.94499	2.8714	3.90513	4.15708	4.10301	3.78694	1.07401	3.05687
TraesCS6B02G000300	VI	UPL3	3.49734	3.46367	3.51045	3.48005	3.57752	3.04792	2.14505	2.76094	2.36849	3.52139	3.77533	3.44168	3.21839	1.1765	2.99946
TraesCS6A02G003300	VI	UPL3	3.28545	3.19838	3.35336	3.39996	3.54355	3.07349	2.09038	2.59401	2.59355	3.74007	3.93869	3.72137	3.49515	1.49243	3.1023
TraesCS2A02G064700	VI	UPL3	3.05948	2.81501	3.01281	2.97151	3.5067	2.47783	2.37511	2.55684	2.59453	4.0152	4.083	3.71532	3.59688	1.87046	3.56183
TraesCS2B02G076900	VI	UPL3	3.00972	3.02351	3.09873	3.0176	3.70155	2.54985	2.42928	2.72191	2.90492	4.05667	4.14869	3.86638	3.64302	1.82962	3.61308
TraesCS1A02G059500	VII	UPL4	0	0	0	0	0	0	0	0	0	0	0	0	0	0	0
TraesCS1A02G288600	VII	UPL4	1.68322	1.95464	2.05746	1.85026	1.48089	2.04087	0.240876	0.419711	1.30595	2.09122	2.75462	2.92829	2.47222	0	2.10724
TraesCS1B02G298000	VII	UPL4	0.778119	1.28812	1.27734	1.32693	0.930222	1.52538	0	0.219033	0.656053	1.25171	2.06565	2.33774	1.54662	0	1.62864
TraesCS1D02G287600	VII	UPL4	1.28223	1.70528	1.69704	1.35712	1.1399	1.31886	0	0.313559	1.11442	1.64154	2.29826	2.53005	1.96974	0	1.98573
