# Supplementary material for: Genome-wide identification and evolution of HECT genes in wheat
Source: PeerJ. 2020 Dec 2;8:e10457. doi: 10.7717/peerj.10457 (PMC7718792; doi:10.7717/peerj.10457)
Supplement: Supplemental Information 4 [file peerj-08-10457-s004.xlsx]

## Sheet: Sheet1
Table S3. TPM transcription count data for 25 HECT genes in wheat leaf senescence.
Gene	Group	Arabidopsis ortholog	3dpa	7dpa	10dpa	13dpa	15dpa	17dpa	19dpa	21dpa	23dpa	26dpa
TraesCS5B02G112800	II	UPL8	17.947	13.9732	19.5242	20.3627	16.6929	20.3148	20.1543	19.4842	27.2275	29.7889
TraesCS5A02G121600	II	UPL8	18.3955	15.2794	21.8859	20.1891	19.2101	20.8555	20.4541	20.8159	28.7144	33.9001
TraesCS5D02G118000	II	UPL8	17.3241	13.0529	19.286	19.312	15.1426	18.5673	19.3182	18.8881	26.2147	30.7497
TraesCS3B02G194900	IV	UPL6	0	0	0	0	0	0	0	0	0	0
TraesCS7B02G313300	IV	UPL6	0.835479	0.736186	0.618271	0.769018	1.00949	0.932399	0.93368	0.986532	1.17974	1.12931
TraesCS1A02G106100	IV	UPL6	18.1349	17.4557	17.8922	16.9806	20.9979	20.2006	22.4266	22.8975	27.9782	32.6542
TraesCS1B02G123400	IV	UPL6	1.60581	1.70513	2.21017	1.83864	2.21824	2.10217	2.27392	2.11164	2.95912	3.77139
TraesCS1D02G108900	IV	UPL6	14.3352	12.5256	12.8311	13.1224	15.3609	15.6002	16.817	16.1865	22.5022	26.0443
TraesCS4D02G025000	V	UPL7	3.46891	3.42333	4.10069	3.49801	4.22919	4.6132	3.97188	3.97867	4.59057	5.11015
TraesCS4B02G027200	V	UPL7	2.70913	2.25746	3.22132	2.63572	3.81765	3.25692	3.33136	3.14425	3.63448	4.62611
TraesCS4A02G285800	V	UPL7	2.5374	2.58535	3.11205	2.62001	3.13412	2.92865	3.1482	3.09524	3.492	4.51209
TraesCS7A02G244000	III	UPL5	0.123823	0.150246	0.221981	0.143651	0.159264	0.0824132	0.133765	0.153873	0.172971	0.150284
TraesCS7B02G496200	III	UPL5	0	0	0	0	0	0	0	0	0	0
TraesCS5D02G270200	III	UPL5	1.86559	2.19575	2.11284	2.26706	2.785	3.00133	2.49169	2.71202	3.74242	4.26676
TraesCS5A02G262600	III	UPL5	1.03452	1.21812	1.22044	1.14309	1.59954	1.68562	1.27464	1.47573	2.09172	1.94786
TraesCS5B02G261000	III	UPL5	1.98255	2.51461	2.58311	2.02873	2.55293	3.20188	2.61523	2.62922	3.99432	4.297
TraesCS6D02G005600	VI	UPL3	13.4599	13.2703	15.2474	14.3536	16.292	15.2632	17.4152	16.0511	19.7384	26.4689
TraesCS6B02G000300	VI	UPL3	1.68702	1.83254	2.15951	1.89369	2.18312	2.224	2.45661	2.40353	3.17221	4.59599
TraesCS6A02G003300	VI	UPL3	10.8543	10.9239	11.5161	11.6873	12.2718	12.8481	13.8204	13.9548	17.7161	22.0839
TraesCS2A02G064700	VI	UPL3	9.22331	7.93468	9.41573	9.45587	8.81161	10.6608	10.7977	10.0148	12.2516	13.2755
TraesCS2B02G076900	VI	UPL3	9.42963	9.38983	9.77228	10.8306	8.88112	11.0394	11.4914	11.5098	13.4901	13.652
TraesCS1A02G059500	VII	UPL4	0	0	0.0052969	0	0	0.00282213	0	0.00925703	0	0
TraesCS1A02G288600	VII	UPL4	3.79106	3.76061	3.79367	4.21886	5.33964	4.88558	5.46235	5.5417	7.13048	6.95386
TraesCS1B02G298000	VII	UPL4	3.31045	3.12515	3.18464	4.21753	4.08649	4.70802	4.95495	5.10611	6.30922	6.37384
TraesCS1D02G287600	VII	UPL4	3.90178	3.79545	3.90802	4.81385	5.19783	5.2184	5.89536	5.4803	7.58093	7.13095
