# Supplementary material for: Genome-wide identification and evolution of HECT genes in wheat
Source: PeerJ. 2020 Dec 2;8:e10457. doi: 10.7717/peerj.10457 (PMC7718792; doi:10.7717/peerj.10457)
Supplement: Supplemental Information 5 [file peerj-08-10457-s005.xlsx]

## Sheet: Sheet1
Table S4. TPM log2-transfromed transcription count data for 25 HECT genes in wheat leaf senescence.
Gene	Group	Arabidopsis ortholog	3dpa	7dpa	10dpa	13dpa	15dpa	17dpa	19dpa	21dpa	23dpa	26dpa
TraesCS5B02G112800	II	UPL8	4.16567	3.80459	4.28719	4.34786	4.06117	4.34446	4.33302	4.28423	4.76699	4.8967
TraesCS5A02G121600	II	UPL8	4.20128	3.93352	4.45193	4.33551	4.26379	4.38235	4.35432	4.37961	4.8437	5.08322
TraesCS5D02G118000	II	UPL8	4.11471	3.7063	4.26948	4.27143	3.92054	4.21469	4.27189	4.23941	4.71231	4.9425
TraesCS3B02G194900	IV	UPL6	0	0	0	0	0	0	0	0	0	0
TraesCS7B02G313300	IV	UPL6	0	0	0	0	0.0136228	0	0	0	0.238469	0.17544
TraesCS1A02G106100	IV	UPL6	4.1807	4.12563	4.16126	4.08581	4.39217	4.33633	4.48714	4.51712	4.80623	5.0292
TraesCS1B02G123400	IV	UPL6	0.683297	0.769881	1.14416	0.878638	1.14941	1.07188	1.18518	1.07836	1.56517	1.9151
TraesCS1D02G108900	IV	UPL6	3.84149	3.64681	3.68157	3.71396	3.94119	3.96349	4.07185	4.01672	4.492	4.70289
TraesCS4D02G025000	V	UPL7	1.79448	1.7754	2.03587	1.80653	2.08038	2.20577	1.98982	1.99229	2.19867	2.35337
TraesCS4B02G027200	V	UPL7	1.43783	1.1747	1.68765	1.3982	1.93268	1.70351	1.73611	1.65272	1.86175	2.2098
TraesCS4A02G285800	V	UPL7	1.34335	1.37036	1.63787	1.38957	1.64806	1.55023	1.65453	1.63005	1.80405	2.17379
TraesCS7A02G244000	III	UPL5	0	0	0	0	0	0	0	0	0	0
TraesCS7B02G496200	III	UPL5	0	0	0	0	0	0	0	0	0	0
TraesCS5D02G270200	III	UPL5	0.899629	1.13471	1.07918	1.18083	1.47768	1.5856	1.31712	1.43937	1.90397	2.09314
TraesCS5A02G262600	III	UPL5	0.0489676	0.284657	0.287404	0.192937	0.67766	0.753278	0.350094	0.561429	1.06469	0.961891
TraesCS5B02G261000	III	UPL5	0.98736	1.33034	1.36911	1.02058	1.35215	1.67892	1.38694	1.39463	1.99795	2.10333
TraesCS6D02G005600	VI	UPL3	3.7506	3.73013	3.93049	3.84334	4.02609	3.93198	4.12227	4.0046	4.30294	4.72623
TraesCS6B02G000300	VI	UPL3	0.754474	0.873842	1.1107	0.921203	1.12639	1.15316	1.29667	1.26515	1.66549	2.20037
TraesCS6A02G003300	VI	UPL3	3.44019	3.44942	3.52558	3.54687	3.61727	3.68348	3.78873	3.80269	4.14699	4.46493
TraesCS2A02G064700	VI	UPL3	3.20528	2.98817	3.23507	3.24121	3.13941	3.41424	3.43265	3.32407	3.6149	3.73069
TraesCS2B02G076900	VI	UPL3	3.2372	3.2311	3.2887	3.43704	3.15074	3.46459	3.52248	3.52479	3.75383	3.77104
TraesCS1A02G059500	VII	UPL4	0	0	0	0	0	0	0	0	0	0
TraesCS1A02G288600	VII	UPL4	1.9226	1.91097	1.92359	2.07685	2.41674	2.28853	2.44952	2.47033	2.834	2.79781
TraesCS1B02G298000	VII	UPL4	1.72703	1.64393	1.67113	2.0764	2.03086	2.23512	2.30887	2.35222	2.65746	2.67216
TraesCS1D02G287600	VII	UPL4	1.96413	1.92427	1.96644	2.26719	2.37791	2.38361	2.55958	2.45425	2.92238	2.83409
